# Supplementary figures and images for: EB1 and EB3 promote cilia biogenesis by several centrosome-related mechanisms
Source: Oxford University Press journal article supplement (doi:10.1242/jcs.085852), 2011-07-18

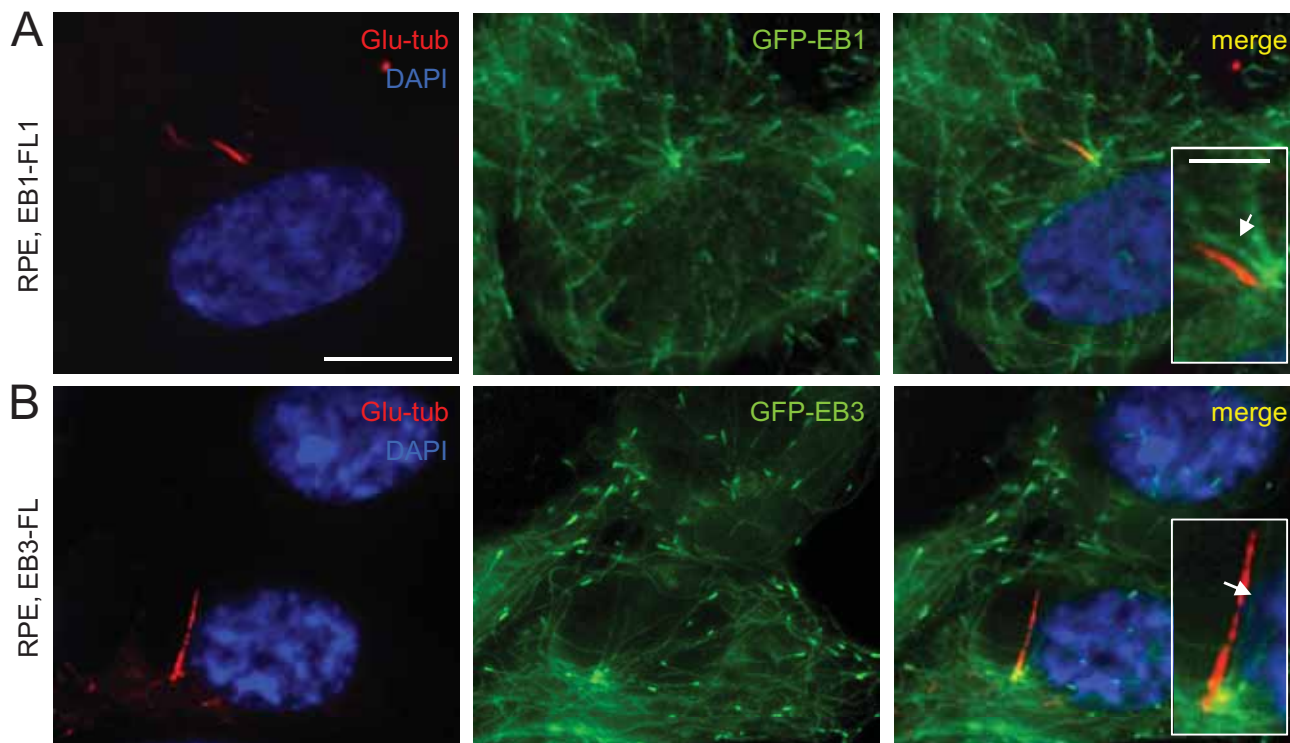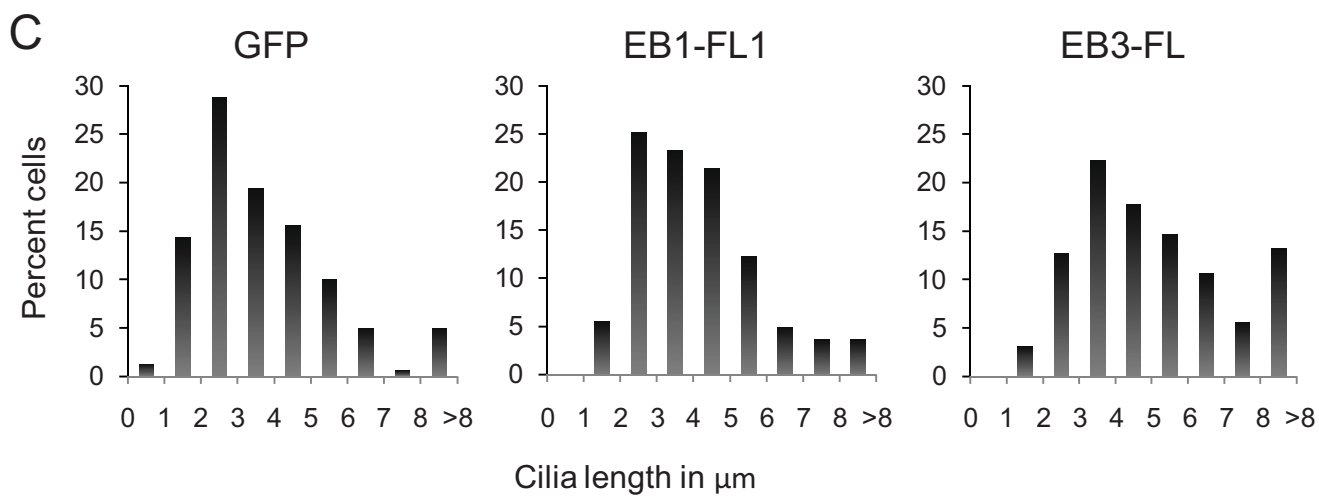

Supplement: jcs085852figs3.pdf [file jcs085852figs3.pdf]
